# Supplementary material for: Gene regulatory effects of a large chromosomal inversion in highland maize
Source: PLOS journal article supplement (doi:10.1371/journal.pgen.1009213), 2020-12-03
Supplement: S6 (10.1371/journal.pgen.1009213.s006) [file journal.pgen.1009213.s006]

GO:Chloroplast thylakoid

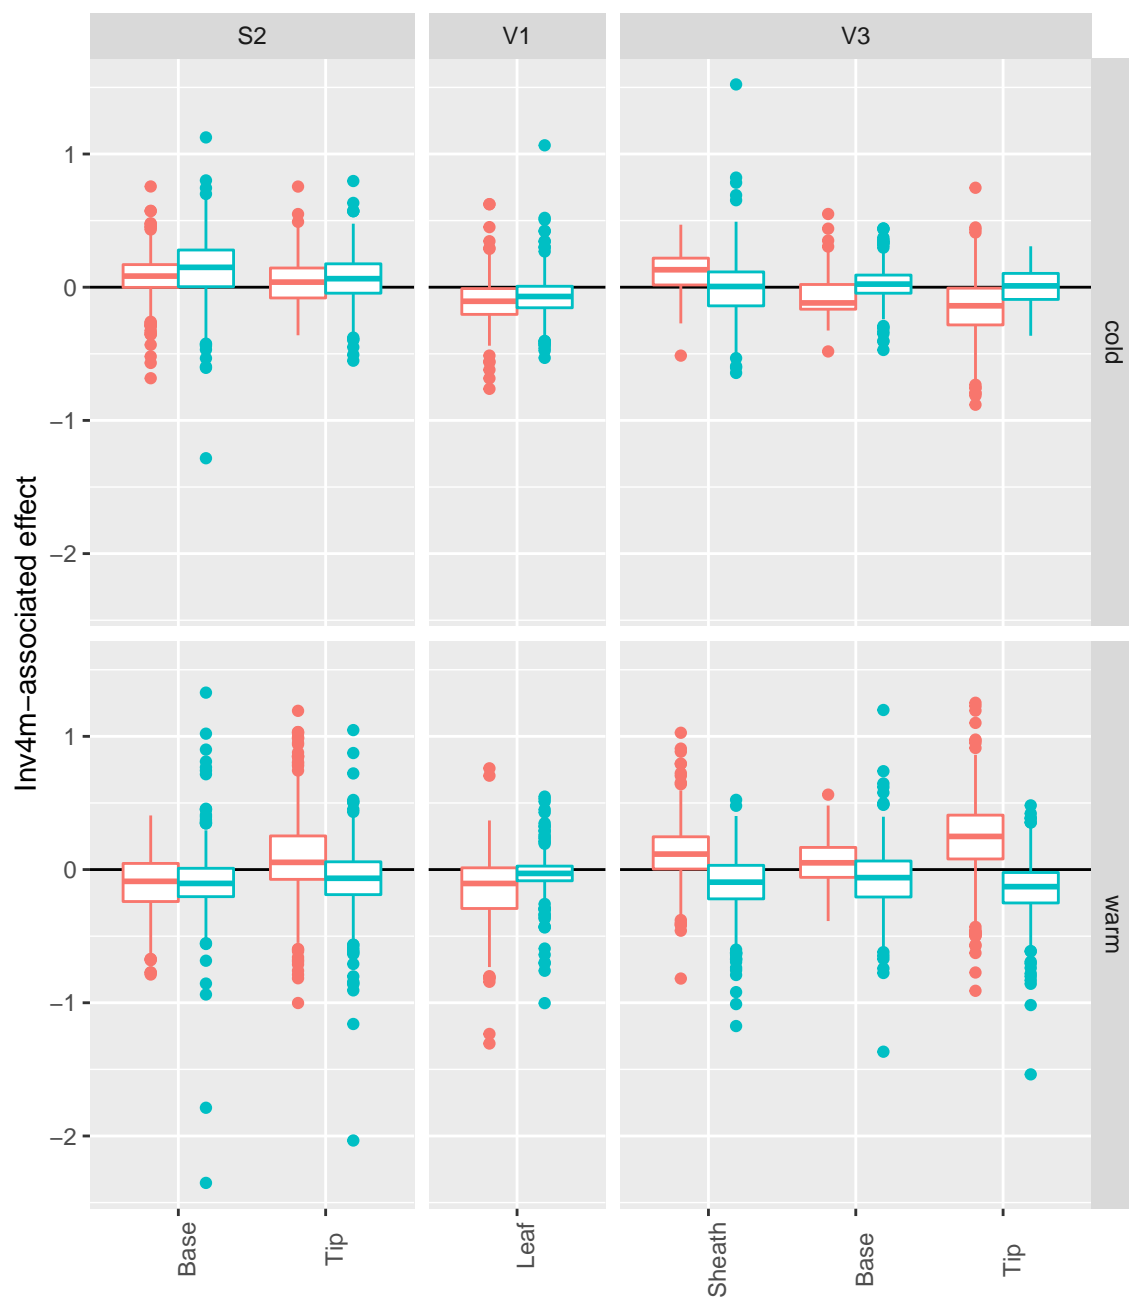

Chloroplast genome

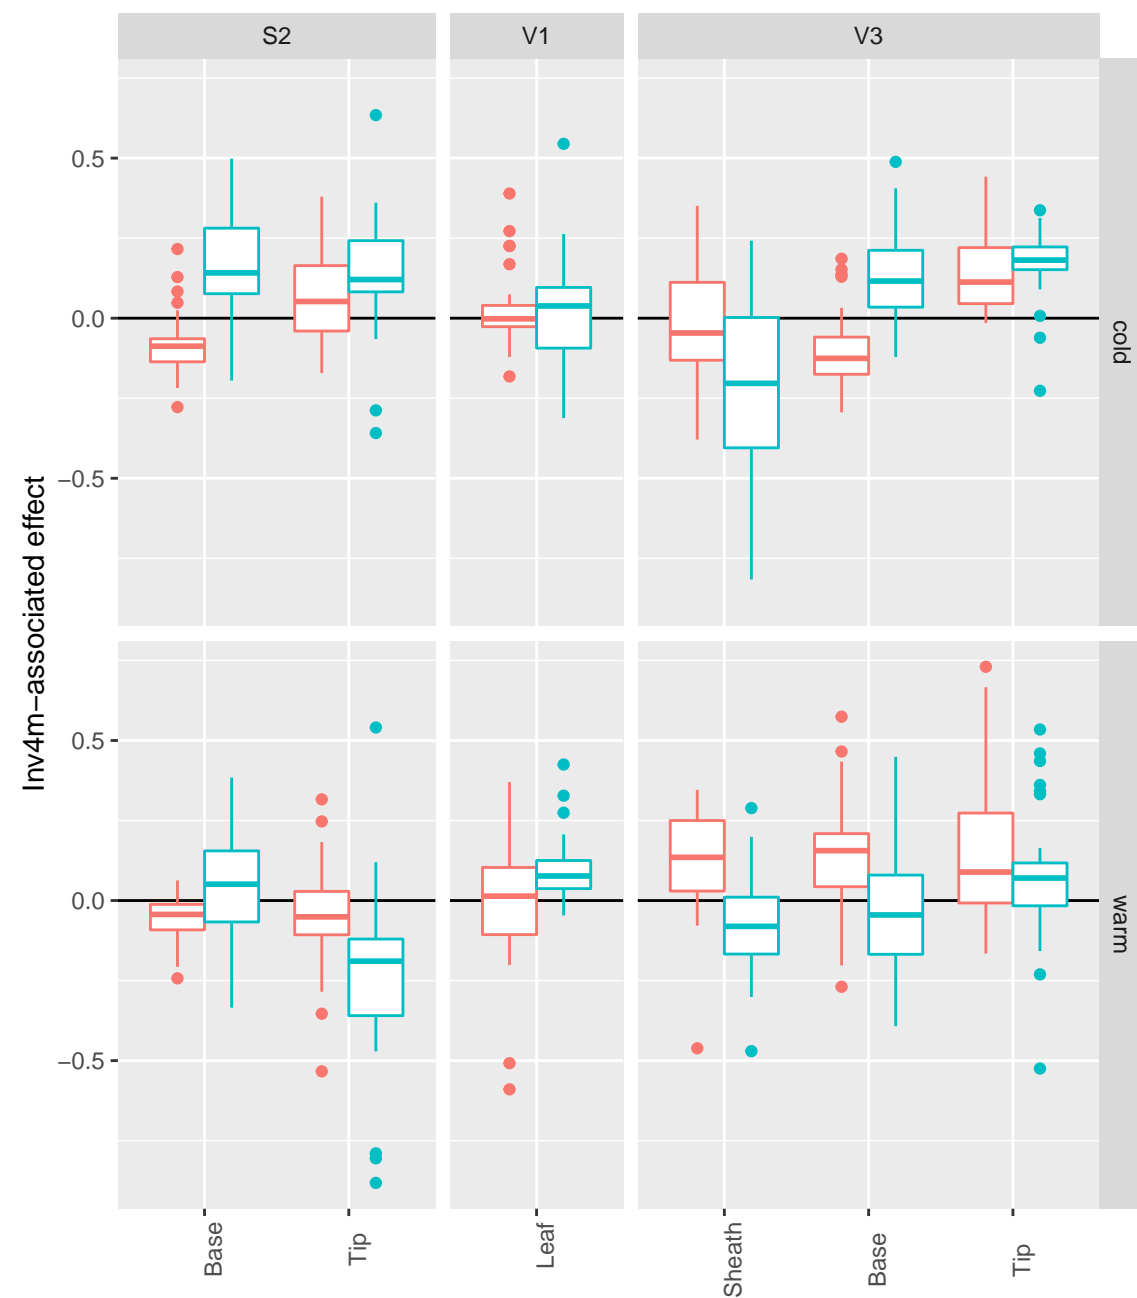

Pop PT Mi21
